# Supplementary material
Source: publisher site journal article supplement (https://www.dovepress.com/article/354031)
Supplement: Supplementary file 1 [file get_supplementary_file.php]

# Supplementary Methods

## Phase 1 Targeted Literature Review

Data for phase 1 was obtained by performing a targeted literature review of the following types of articles: qualitative studies, abstracts from professional meetings, ongoing/completed phase 3 and 4 clinical trials, and labels for select FDA- and EMA-approved products. These sources were used to construct our CDM to summarize signs and symptoms of FOS.

### Qualitative studies

A targeted literature review was conducted in conjunction with a librarian using Embase, MEDLINE, PubMed, and PsychINFO to identify qualitative studies published after 2010 that reported concepts important to patients (eg, key symptoms, health-related quality of life [HRQoL]) impacts, work impairment, functional limitations) and regulatory agencies. Details of the search strategy for Ovid (Embase, MEDLINE, and PubMed) and PsychINFO are provided in **Supplementary Tables 1** and **2**, respectively.

### Abstracts from professional meetings

To identify any new qualitative research conducted in epilepsy patient populations, abstracts from relevant professional meetings for the previous 2 years (or past 2 meetings for biennial conferences) were reviewed, including the Professional Society for Health Economics and Outcomes Research (ISPOR), the American Epilepsy Society (AES), the American Academy of Neurology (AAN), and the Pipeline Conference of the Epilepsy Foundation. Query terms for this abstract search included epileptic seizures, epilepsy, seizures, qualitative, interview, concept elicitation, and ethnography. Inclusion criteria for selected abstracts included qualitative studies, literature reviews, or meta-reviews whose disease of focus was epilepsy, including patients who experience either aware FOS or impaired awareness FOS (**Figure 1**). Selected abstracts evaluated adults aged at least 18 years who spoke the English language. Abstracts were excluded from studies conducted in patients without epilepsy, basic science studies, articles that discuss nonhuman populations or in vitro studies, studies whose design was out of scope (eg, phase 2 clinical trials or case studies), and gray literature (eg, editorials, commentaries, letters to the editor). Abstracts written in languages other than English were excluded.

### Clinical trials

Query terms for this search included FOS, partial onset seizures, simple partial seizures, and complex partial seizures. Inclusion criteria for selected trials included interventional studies of adults aged 18–65 or those aged at least 66, whose disease of focus was epilepsy, including patients who experienced either aware FOS or impaired awareness FOS. Eligible studies were funded by industry and were ongoing (not yet recruiting, recruiting, enrolling by invitation or active not recruiting) or completed. Trials were excluded if they were conducted prior to March 1, 2009, were phase 1/2 or observational studies, had status listed as suspended, terminated, withdrawn, or unknown, or did not name a PRO. Studies written in languages other than English were excluded.

### Labels for select approved products

In addition to FDA and EMA databases, an internal product label database, which serves as a repository of new molecular entities approved by both the FDA and EMA with a PRO claim for completeness, was searched to identify relevant product labels.

## Phase 2 targeted literature review

In the targeted literature search of published articles and conference abstracts, we reviewed only article titles and abstracts to identify the COAs listed in each study. Abstracts that did not specify the type of epilepsy were included.

### Evaluation of reliability and validity in the gap analysis

Reliability was evaluated through internal-consistency reliability, defined as the extent to which items comprising a scale measure the same concept using Cronbach’s alpha as a coefficient of consistency [Tavakol 2011]. Test-retest reliability of COAs was defined as the stability of scores over time when no change is expected and assessed through Pearson’s *r* or the ICC, with a value of 1 indicating perfect correlation [Vaz 2013]. Inter-rater reliability was defined as agreement from two or more raters (not applicable for self-completed COAs). Content validity of COAs was defined as the evidence that the tool measures the COI and is understood by target patients (validity was confirmed if literature review interviews/focus groups were conducted with patients with epilepsy or if expert input was obtained at the time of development). Construct validity of COAs was defined as the evidence that relationships among items, domains, and concepts conform to a priori hypotheses, while known-groups validity was defined as the ability of a measure to distinguish between known groups. The ability to detect change was defined as the ability of COAs to detect differences in scores over time. COAs were evaluated for whether they defined a clinically meaningful change; eg, patients who exhibit a change in score associated with a treatment benefit.

# Supplementary Data

**Supplementary Table 1.** Ovid Search Algorithm (Embase & MEDLINE) for Phase 1 Qualitative Literature Search

| **Search Number** | **Search Terms** | **Results** |
| --- | --- | --- |
| 1 | exp *Epilepsy/ | 223,691 |
| 2 | exp *Epilepsy/px | 4,109 |
| 3 | exp *Seizures/px | 717 |
| 4 | 2 or 3 | 4,661 |
| 5 | 1 or 4 | 224,212 |
| 6 | *Qualitative Research/ or *Quality of Life/ or "Surveys and Questionnaires"/ or *Patient Satisfaction/ or Interviews as Topic/ or ("quality of life" or HRQL or HRQOL or QOL or qualitative or interview*).ti,ab. or concept elicitation.mp. | 2,490,440 |
| 7 | 5 and 6 | 14,162 |
| 8 | limit 7 to english language | 12,884 |
| 9 | limit 8 to yr="2011 -Current" | 7,206 |
| 10 | limit 9 to humans | 7,027 |
| 11 | limit 10 to "all child (0 to 18 years)" [Limit not valid in Embase; records were retained] | 5,914 |
| 12 | 10 not 11 | 1,113 |
| 13 | limit 12 to (infant <to one year> or child <unspecified age> or preschool child <1 to 6 years> or school child <7 to 12 years> or adolescent <13 to 17 years>) [Limit not valid in Ovid MEDLINE(R),Ovid MEDLINE(R) Daily Update,Ovid MEDLINE(R) In-Process,Ovid MEDLINE(R) Publisher; records were retained] | 1,113 |
| 14 | 10 not 13 | 5,914 |
| 15 | remove duplicates from 14 | 5,052 |
| 16 | 4 and 15 | 116 |
| 17 | (pediatric or child or children or adolescent$ or youth$).ti. | 1,756,424 |
| 18 | 16 not 17 | 69 |
| 19 | *Theoretical Models/ | 57,750 |
| 20 | *Epilepsy/ or *Seizure/ | 195,417 |
| 21 | 19 and 20 | 32 |
| 22 | Qualitative research/ | 107,215 |
| 23 | 4 and 22 | 46 |
| 24 | 18 or 21 or 23 | 144 |
| 25 | limit 24 to english language | 141 |
| 26 | limit 25 to yr="2011 -Current" | 125 |
| 27 | limit 26 to humans | 123 |
| 28 | remove duplicates from 27 | 123 |

HRQL, health-related quality of life; HRQOL, health-related quality of life; QOL, quality of life.

**Supplementary Table 2.** PsycINFO Algorithm for Phase 1 Qualitative Literature Search

| Search Number | Search Terms | Results |
| --- | --- | --- |
| 1 | (DE "Epileptic Seizures" OR DE "Epilepsy" OR DE "Seizures") AND ("partial onset" OR "simple partial" or "complex partial") | 1,419 |
| 2 | impairment or limitations or functioning or function or functional or HRQL or HRQOL or QOL or qualitative or symptom or symptoms or impairment or concept elicitation | 1,203,729 |
| 3 | 1 AND 2 | 580 |
| 4 | 1 AND 2  Narrow by SubjectAge: - neonatal (birth-1 mo)  Narrow by SubjectAge: - infancy (2-23 mo)  Narrow by SubjectAge: - preschool age (2-5 yrs)  Narrow by SubjectAge: - adolescence (13-17 yrs)  Narrow by SubjectAge: - school age (6-12 yrs)  Narrow by SubjectAge: - childhood (birth-12 yrs) | 162 |
| 5 | 3 NOT 4  Limiters - Publication Year: 2011-2019; Language: English; Population Group: Human | 418 |
| 6 | (DE "Qualitative Research") OR (DE "Quality of Life" OR DE "Quality of Work Life") OR (DE "Symptoms") or theoretical model or TI(qualitative research) OR TI(quality or qualitative) | 200,825 |
| 7 | 5 AND 6 | 13 |

HRQL, health-related quality of life; HRQOL, health-related quality of life; QOL, quality of life.

**Supplementary Table 3.** Phase 1 Published Articles (n = 13) and Abstracts (n = 1) Matching Inclusion Criteria from Qualitative Literature Review

| Article or Abstract No. | Reference | Title | Study Population | Study Objectives | PROs Used | Included in Kerr 2011’s CDM?a |
| --- | --- | --- | --- | --- | --- | --- |
| 1 | Harden J et al. *Chronic Illness.* 2015;11:230-41. | ‘If you're gonna die, you're gonna die': Young adults' perceptions of sudden unexpected death in epilepsy | - N = 27 - Patients experienced TCS and impaired awareness FOS | To explore views and experiences of young adults with epilepsy related to sudden unexpected death in epilepsy (SUDEP) including risk associated and information giving/seeking | HADS | – |
| 2 | Walker ER et al. *Epilepsy Behav.* 2015;53:43474. | A dyadic model of living with epilepsy based on the perspectives of adults with epilepsy and their support persons | - N = 38 (n = 22 patients with epilepsy; n = 16 primary support persons) - Patients experienced generalized seizures and FOS | To examine the experiences of both patients with epilepsy and primary support persons, and to explore their interpersonal relationships | – | – |
| 3 | Collard SS and Marlow C.  *Epilepsy Behav.* 2016;61:199-205. | The psychosocial impact of exercising with epilepsy: A narrative analysis | - N = 4 - n = 2 patients experienced FOS - n = 2 patients experienced TCS | To examine the psychosocial impact of exercise in people with epilepsy | QOLIE-31;  QOLIE-31-P | – |
| 4 | Borghs S et al. *Patient.* 2016;9:419-31. | Understanding the patient perspective of seizure severity in epilepsy: development of a conceptual model | - N = 25 - n = 12 patients experienced primary generalized TCS - n = 13 patients experienced FOS | To understand the real-life experiences, including signs, symptoms, and impacts on patients with uncontrolled epilepsy, with a specific focus on how patients experience and describe seizure severity | – | – |
| 5 | Perzynski AT et al. *Chronic Illness*. 2017;13:188-203. | Barriers and facilitators to epilepsy self-management for patients with physical and psychological comorbidity | - N = 22 (n = 9 patients with epilepsy; n = 5 care partners; n = 8 health professionals) - Patients experienced primary generalized, TCS, and FOS | To identify barriers and facilitators to self-management for persons with epilepsy complicated by comorbid mental health conditions and serious medical events, to inform future epilepsy self-management interventions | – | – |
| 6 | Michaelis R et al. *Complement Med Res.* 2017;24:215-224. | How can we enhance the sense of self-efficacy in epilepsy? Individual responses from two qualitative case reports | - N = 9 patients completed pre- and post-intervention interviews - N = 2 patients completed case studies - Patients experienced generalized TCS and FOS | To assess the impact of a mindfulness-based and resource-based intervention on awareness and self-efficacy, and to compare first-person narratives of participant experiences with the QOLIE-31 | – | – |
| 7 | Kilinc S et al. *Epilepsy Behav.* 2017;73:189-196. | The experience of living with adult-onset epilepsy | - N = 39 - n = 33 patients experienced generalized seizures - n = 6 patients experienced FOS | To examine the experience of living with epilepsy following diagnosis as an adult | – | – |
| 8 | Michaelis R et al. *Epilepsy Behav.* 2018;84:152-161. | Seizures have become a means of somehow learning things about myself - A qualitative study of the development of self-efficacy and mastery during a psychotherapeutic intervention for people with epilepsy | - N = 9 - Patients experienced generalized TCS, impaired awareness FOS, and aware FOS | To explore the relationship between the lived experience of epilepsy-specific self-efficacy and mastery (i.e., control over one's life) in people with epilepsy who participated in a resource-oriented and mindfulness-based psychotherapeutic intervention. | – | – |
| 9 | Scott AJ et al. *Epilepsy Behav.* 2018;85:95-104. | A qualitative examination and theoretical model of anxiety in adults with epilepsy | - N = 26 - Patients experienced FOS, generalized, and unspecified seizure types | To explore possible explanations for why some people with epilepsy develop anxiety disorders and others do not, and what processes play a role in the development and maintenance of anxiety in epilepsy | CES-D | – |
| 10 | Bishop M et al. *Epilepsy Behav.* 2003;4:226-33. | The impact of epilepsy on quality of life: a qualitative analysis | - N = 46 - Patients experienced TCS, impaired awareness FOS, and aware FOS | To identify QoL domains important to persons with epilepsy and factors that detract from and contribute to QoL | – | **** |
| 11 | Velissaris S et al. *Epilepsy Behav.* 2007;10:223-33. | The psychological impact of a newly diagnosed seizure: losing and restoring perceived control | - N = 90 patients with newly diagnosed seizure - Patients experienced TCS, impaired awareness FOS, and aware FOS | To characterize the process of psychosocial adjustment following a newly diagnosed seizure disorder | NEWQoL;  COPE | **** |
| 12 | Raty L et al. *Epilepsy Behav.* 2007;10:389-97. | Daily life in epilepsy: patients’ experiences described by emotions | - N = 95 - 36% of patients experienced primary generalized TCS - 19% of patients experienced impaired awareness FOS | To assess daily life impacts of epilepsy on young adults described through emotions | – | **** |
| 13 | Raty L et al.  *J Neurosci Nursing.* 2009;41:201-10. | Epilepsy patients’ conceptions of epilepsy as a phenomenon | - N = 19 - Patients experienced TCS and impaired awareness FOS | To explore patients’ conceptions of epilepsy as a phenomenon and emotions related to their conception | – | **** |
| 14b | French JA et al. Abstract 1.196, presented at the 2018 Annual Meeting of the American Epilepsy Societyb | Symptoms and impacts in epilepsy: findings from qualitative patient interviews | - N = 62 - Patients experienced FOS | To describe patients’ experiences of living with epilepsy, including occurrence of disease-related signs and symptoms and impacts on daily life at different stages of the disease | – | – |

aKerr C et al. *Seizure.* 2011;20:764-74.

bAbstract from professional congress; https://www.aesnet.org/meetings_events/annual_meeting_abstracts/view/500396.

CES-D, Centers for Epidemiologic Studies Depression Scale; COPE; Cognitive Anti-Epileptic Drug Outcomes in Pediatric Localization Related Epilepsy; FOS, focal onset seizures; HADS, Hospital Anxiety and Depression Scale; NEWQoL, Quality of Life in Newly Diagnosed Epilepsy Instrument; QoL, quality of life; QOLIE-31, Quality of Life in Epilepsy–31-item version; QOLIE-31-P, Patient-Weighted Quality of Life in Epilepsy–31-item version; TCS, tonic-clonic seizures.

**Supplementary Table 4.** Search Parameters Used to Identify Clinical Trials in Phase 1 Qualitative Literature Search

| Parameter | Category | Key Words |
| --- | --- | --- |
| 1 | Condition or diseasea | “Focal onset seizures”; “partial onset seizures”; “simple partial seizures”; “complex partial seizures” |
| 2 | Study type | Interventional studies (clinical trials) |
| 3 | Recruitment status | Not yet recruiting; Recruiting; Enrolling by invitation; Active not recruiting |
| 4 | Eligibility criteria: Age group | Adults (18–65); Senior (66+) |
| 5 | Additional criteria: Phase | Phase 3; Phase 4 |
| 6 | Additional criteria: Funder type | Industry |
| 7 | Study start | March 1, 2009 to March 26, 2019 |

aA separate search was conducted for each seizure type.

**Supplementary Table 5.** Ovid Search Algorithm (Embase & MEDLINE) for Phase 2 COA Search

| Search Number | Search Terms | Results |
| --- | --- | --- |
| 1 | EPILEPSY, PARTIAL, MOTOR/ or EPILEPSY, ABSENCE/ or EPILEPSY, COMPLEX PARTIAL/ or EPILEPSY, GENERALIZED/ or EPILEPSY, PARTIAL, SENSORY/ or MYOCLONIC EPILEPSY, JUVENILE/ or ((focal or focal onset or partial onset or myoclonic absences) adj1 (seizure$ or epilepsy)).mp. | 58,196 |
| 2 | ((developmental and epileptic encephalopathies) or (developmental and epileptic encephalopathy) or DEE).mp. | 2,875 |
| 3 | 1 or 2 | 60,805 |
| 4 | Patient Satisfaction/ or self report/ or patient preference/ or Caregivers/ or (patient satisfaction or patient reported or self report or self reported or observer reported or observer rated or caregiver* or ClinROs or clinician reported outcomes or ObsROs or observer reported outcomes).ti,ab. | 769,089 |
| 5 | Quality of Life/ or Patient Satisfaction/ or (quality of life or HRQL or HRQOL or QOL or symptom or symptoms or impairment or function or functioning or functional).ti,ab. | 8,952,272 |
| 6 | (outcome or outcomes or measure or measures or scale or instrument or assessment or questionnaire or index or inventory).ti,ab. | 9,340,103 |
| 7 | 4 or 5 or 6 | 15,906,477 |
| 8 | 3 and 7 | 24,618 |
| 9 | limit 8 to phase 3 clinical trial [Limit not valid in Ovid MEDLINE(R),Ovid MEDLINE(R) Daily Update,Ovid MEDLINE(R) In-Process,Ovid MEDLINE(R) Publisher; records were retained] | 5,390 |
| 10 | limit 9 to English language | 4,987 |
| 11 | limit 10 to yr="2008 -Current" | 3,106 |
| 12 | limit 11 to humans | 2,455 |
| 13 | remove duplicates from 12 | 2,425 |
| 14 | limit 13 to (clinical trial or randomized controlled trial or controlled clinical trial or phase 3 clinical trial) [Limit not valid in Ovid MEDLINE(R),Ovid MEDLINE(R) Daily Update,Ovid MEDLINE(R) In-Process,Ovid MEDLINE(R) Publisher; records were retained] | 222 |
| 15 | limit 14 to (clinical trial, all or clinical trial, phase iii or randomized controlled trial) [Limit not valid in Embase; records were retained] | 176 |

ClinROs, clinician-reported outcomes; DEE, developmental and epileptic encephalopathy; HRQL, health-related quality of life; HRQOL, health-related quality of life; QOL, quality of life; ObsROs, observer-reported outcomes.

**Supplementary Table 6.** PsycINFO Algorithm for Phase 2 COA Search

| Search Number | Search Terms | Results |
| --- | --- | --- |
| 1 | (DE "Epileptic Seizures" OR DE "Experimental Epilepsy" OR DE "Epilepsy" OR DE "Seizures") AND (partial OR generalized OR focal OR myoclonic absences) OR (((developmental and epileptic encephalopathies) or (developmental and epileptic encephalopathy) or DEE)) | 9,722 |
| 2 | Patient Satisfaction or self report or patient preference or Caregivers or patient satisfaction or patient reported or self report or self reported or observer reported or observer rated or caregiver or ClinROs or clinician reported outcomes or ObsROs or observer reported outcomes | 126,798 |
| 3 | (DE "Quality of Life" OR DE "Quality of Work Life") OR (DE "Symptoms") or Quality of Life or Patient Satisfaction or quality of life or HRQL or HRQOL or QOL or symptom or symptoms or impairment or function or functioning or functional or or HRQL or HRQOL or QOL | 392,269 |
| 4 | outcome or outcomes or measure or measures or scale or instrument or assessment or questionnaire or index or inventory | 839,245 |
| 5 | DE "Treatment Outcomes" OR DE "Side Effects (Treatment)" OR DE "Treatment Effectiveness Evaluation" | 27,080 |
| 6 | 2 OR 3 OR 4 OR 5 | 985,061 |
| 7 | 1 AND 6  Limiters - Publication Year: 2008-2019; Language: English; Population Group: Human; Methodology: CLINICAL TRIAL | 100 |

ClinROs, clinician-reported outcomes; COA, clinical outcome assessment; DEE, developmental and epileptic encephalopathy; HRQL, health-related quality of life; HRQOL, health-related quality of life; QOL, quality of life.

**Supplementary References** [17/not specified]

1. Tavakol M and Dennick R. *Int J Med Ed.* 2011;2:53–55.
2. Vaz S et al. *PLoS ONE*. 2013;8:e73990.
3. Harden et al. *Chronic Illness.* 2015;11:230–241.
4. Walker et al. *Epilepsy Behav*. 2015;53:1–9.
5. Collard et al. *Epilepsy Behav*. 2016;61:199–205.
6. Borghs et al. *Patient*. 2016;9:419–431.
7. Perzynski et al. *Chronic Illness.* 2017;13:188–203.
8. Michaelis et al. *Complement Med Res*. 2017;24:215–224.
9. Kilinc et al. *Epilepsy Behav*. 2017;73:189–196.
10. Michaelis et al. *Epilepsy Behav*. 2018;84:152–161.
11. Scott et al. *Epilepsy Behav*. 2018;85:95–104.
12. Bishop et al. *Epilepsy Behav*. 2003;4:226–233.
13. Velissaris et al. *Epilepsy Behav*. 2007;10:223–233.
14. Raty et al. *Epilepsy Behav*. 2007;10:389–397.
15. Raty et al. *J Neurosci Nursing*. 2009;41:201–210.
16. French JA et al. Abstract 1.196, presented at the 2018 Annual Meeting of the American Epilepsy Society, 2018. Available at: <https://www.aesnet.org/abstractslisting/symptoms-and-impacts-in-epilepsy--findings-from-qualitative-patient-interviews>. Accessed October 25, 2021.
17. Kerr C et al. *Seizure.* 2011;20:764–774.
